# Supplementary material for: A hidden reservoir of integrative elements is the major source of recently acquired foreign genes and ORFans in archaeal and bacterial genomes
Source: PubMed Central journal article supplement (PMC2718499; doi:10.1186/gb-2009-10-6-r65), 2009-06-16
Supplement: gb-2009-10-6-r65-S1.pdf [file gb-2009-10-6-r65-S1.pdf]

| Groups            | Species                          | Number of genes | Number of atypical genes | % of atypical genes | Number of atypical genes in CAGs | % of atypical genes in CAGs | Number of CAGs | Number of genes in CAGs | % of genes in CAGs | Number of orphans | Number of orphans in CAGs | % of orphans in CAGs | Species-specific core gene dataset | Species-specific cut off | Number of tRNA genes per genome | Number of tRNA genes lying next to a CAG | % of tRNA genes lying next to a CAG | Number of CAGs lying next to a tRNA gene | % of CAGs lying next to a tRNA gene |
|-------------------|----------------------------------|-----------------|--------------------------|---------------------|----------------------------------|-----------------------------|----------------|-------------------------|--------------------|-------------------|---------------------------|----------------------|------------------------------------|--------------------------|---------------------------------|------------------------------------------|-------------------------------------|------------------------------------------|-------------------------------------|
| Thermococcales    | <i>P. abyssi</i>                 | 1993            | 95                       | 4,77                | 24                               | 25,26                       | 3              | 32                      | 1,61               | 48                | 6                         | 12,50                | 80%                                | 0.4                      | 46                              | 0                                        | 0                                   | 0                                        | 0                                   |
|                   | <i>P. horikoshii</i>             | 2005            | 213                      | 10,62               | 83                               | 38,97                       | 5              | 113                     | 5,64               | 127               | 27                        | 21,26                | 80%                                | 0.5                      | 46                              | 1                                        | 2,17                                | 2                                        | 40,00                               |
|                   | <i>P. furiosus</i>               | 2228            | 302                      | 13,55               | 179                              | 59,27                       | 11             | 234                     | 10,50              | 91                | 27                        | 29,67                | 50%                                | 0.5                      | 46                              | 2                                        | 4,35                                | 2                                        | 18,18                               |
|                   | <i>T. kodakaraensis</i>          | 2357            | 455                      | 19,30               | 249                              | 54,73                       | 14             | 294                     | 12,47              | 257               | 104                       | 40,47                | 50%                                | 0.5                      | 45                              | 4                                        | 8,89                                | 6                                        | 42,86                               |
| Thermoplasmatales | <i>T. acidophilum</i>            | 1530            | 71                       | 4,64                | 21                               | 29,58                       | 2              | 26                      | 1,70               | 39                | 7                         | 17,95                | 50%                                | 0.5                      | 45                              | 0                                        | 0                                   | 0                                        | 0                                   |
|                   | <i>T. volcanium</i>              | 1548            | 106                      | 6,85                | 77                               | 72,64                       | 5              | 97                      | 6,27               | 31                | 16                        | 51,61                | 70%                                | 0.5                      | 45                              | 2                                        | 4,44                                | 3                                        | 60,00                               |
|                   | <i>P. torridus</i>               | 1581            | 158                      | 9,99                | 59                               | 37,34                       | 5              | 74                      | 4,68               | 65                | 16                        | 24,62                | 50%                                | 0.6                      | 43                              | 2                                        | 4,65                                | 3                                        | 60,00                               |
|                   | <i>M. aeolicus</i>               | 1552            | 115                      | 7,41                | 41                               | 35,65                       | 3              | 50                      | 3,22               | 43                | 21                        | 48,84                | 60%                                | 0.6                      | 37                              | 0                                        | 0                                   | 0                                        | 0                                   |
| Methanococcales   | <i>M. jannaschii</i>             | 1772            | 241                      | 13,60               | 74                               | 30,71                       | 6              | 88                      | 4,97               | 115               | 31                        | 26,96                | 50%                                | 0.5                      | 37                              | 1                                        | 2,70                                | 1                                        | 16,67                               |
|                   | <i>M. vannielii</i>              | 1752            | 102                      | 5,82                | 61                               | 59,80                       | 4              | 76                      | 4,34               | 19                | 7                         | 36,84                | 90%                                | 0.5                      | 37                              | 2                                        | 5,41                                | 4                                        | 100,00                              |
|                   | <i>M. maripaludis</i>            | 1772            | 99                       | 5,59                | 42                               | 42,42                       | 3              | 59                      | 3,33               | 12                | 2                         | 16,67                | 50%                                | 0.5                      | 38                              | 1                                        | 2,63                                | 2                                        | 66,67                               |
|                   | <i>M. maripaludis_c5</i>         | 1879            | 145                      | 7,72                | 88                               | 60,69                       | 7              | 120                     | 6,39               | 36                | 23                        | 63,89                | 90%                                | 0.5                      | 36                              | 0                                        | 0                                   | 0                                        | 0                                   |
|                   | <i>M. maripaludis_c6</i>         | 1888            | 196                      | 10,38               | 137                              | 69,90                       | 9              | 182                     | 9,64               | 62                | 43                        | 69,35                | 50%                                | 0.4                      | 36                              | 1                                        | 2,78                                | 1                                        | 11,11                               |
|                   | <i>M. maripaludis_c7</i>         | 1855            | 179                      | 9,65                | 118                              | 65,92                       | 8              | 146                     | 7,87               | 21                | 17                        | 80,95                | 60%                                | 0.5                      | 36                              | 2                                        | 5,56                                | 3                                        | 37,50                               |
|                   | <i>H. marismortui</i>            | 3189            | 576                      | 18,06               | 206                              | 35,76                       | 16             | 267                     | 8,37               | 368               | 80                        | 21,74                | 80%                                | 0.4                      | 48                              | 7                                        | 14,58                               | 11                                       | 68,75                               |
| Halobacteriales   | <i>H. walsbyi</i>                | 2875            | 786                      | 27,34               | 570                              | 72,52                       | 32             | 732                     | 25,46              | 205               | 105                       | 51,22                | 50%                                | 0.6                      | 44                              | 4                                        | 9,09                                | 4                                        | 12,50                               |
|                   | <i>Halobacterium sp.</i>         | 2127            | 122                      | 5,74                | 58                               | 47,54                       | 6              | 80                      | 3,76               | 180               | 23                        | 12,78                | 80%                                | 0.4                      | 47                              | 1                                        | 2,13                                | 1                                        | 16,67                               |
|                   | <i>M. pharaonis</i>              | 2726            | 549                      | 20,14               | 251                              | 45,72                       | 18             | 328                     | 12,03              | 240               | 70                        | 29,17                | 50%                                | 0.6                      | 46                              | 7                                        | 15,22                               | 9                                        | 50,00                               |
|                   | <i>M. acetivorans</i>            | 4721            | 749                      | 15,87               | 250                              | 33,38                       | 19             | 319                     | 6,76               | 461               | 120                       | 26,03                | 70%                                | 0.5                      | 59                              | 2                                        | 3,39                                | 3                                        | 15,79                               |
| Methanosarcinales | <i>M. barkeri</i>                | 3811            | 276                      | 7,24                | 38                               | 13,77                       | 4              | 50                      | 1,31               | 117               | 12                        | 10,26                | 50%                                | 0.5                      | 62                              | 1                                        | 1,61                                | 1                                        | 25,00                               |
|                   | <i>M. mazei</i>                  | 3437            | 289                      | 8,41                | 79                               | 27,34                       | 9              | 101                     | 2,94               | 124               | 23                        | 18,55                | 70%                                | 0.5                      | 57                              | 0                                        | 0                                   | 0                                        | 0                                   |
|                   | <i>S. acidocaldarius</i>         | 2329            | 175                      | 7,51                | 47                               | 26,86                       | 2              | 59                      | 2,53               | 105               | 8                         | 7,62                 | 50%                                | 0.6                      | 49                              | 2                                        | 4,08                                | 3                                        | 150,00                              |
| Sulfolobales      | <i>S. solfataricus</i>           | 3029            | 475                      | 15,68               | 316                              | 66,53                       | 28             | 404                     | 13,34              | 95                | 25                        | 26,32                | 70%                                | 0.4                      | 46                              | 4                                        | 8,70                                | 6                                        | 21,43                               |
|                   | <i>S. tokodaii</i>               | 2874            | 462                      | 16,08               | 224                              | 48,48                       | 18             | 295                     | 10,26              | 266               | 90                        | 33,83                | 70%                                | 0.5                      | 46                              | 4                                        | 8,70                                | 5                                        | 27,78                               |
|                   | <i>P. aerophilum</i>             | 2706            | 492                      | 18,18               | 286                              | 58,13                       | 26             | 363                     | 13,41              | 169               | 82                        | 48,52                | 50%                                | 0.5                      | 47                              | 1                                        | 2,13                                | 2                                        | 7,69                                |
| Pyrobaculum       | <i>P. arsenaticum</i>            | 2407            | 214                      | 8,89                | 98                               | 45,79                       | 9              | 130                     | 5,40               | 60                | 19                        | 31,67                | 60%                                | 0.5                      | 41                              | 2                                        | 4,88                                | 4                                        | 44,44                               |
|                   | <i>P. caldifontis</i>            | 2200            | 129                      | 5,86                | 26                               | 20,16                       | 3              | 35                      | 1,59               | 71                | 7                         | 9,86                 | 60%                                | 0.6                      | 22                              | 0                                        | 0                                   | 0                                        | 0                                   |
|                   | <i>P. islandicum</i>             | 2062            | 139                      | 6,74                | 42                               | 30,22                       | 4              | 50                      | 2,42               | 40                | 10                        | 25,00                | 80%                                | 0.5                      | 45                              | 0                                        | 0                                   | 0                                        | 0                                   |
|                   | <i>P. marinus</i>                | 1930            | 439                      | 22,75               | 284                              | 64,69                       | 16             | 369                     | 19,12              | 73                | 48                        | 65,75                | 50%                                | 0.5                      | 40                              | 5                                        | 12,50                               | 8                                        | 50,00                               |
| Prochlorococcus   | <i>P. marinus_med4</i>           | 1760            | 73                       | 4,15                | 27                               | 36,99                       | 2              | 33                      | 1,88               | 9                 | 3                         | 33,33                | 50%                                | 0.6                      | 38                              | 1                                        | 2,63                                | 1                                        | 50,00                               |
|                   | <i>P. marinus_mit9312</i>        | 1855            | 101                      | 5,44                | 40                               | 39,60                       | 5              | 51                      | 2,75               | 24                | 8                         | 33,33                | 90%                                | 0.5                      | 40                              | 1                                        | 2,50                                | 2                                        | 40,00                               |
|                   | <i>P. marinus_mit9313</i>        | 2328            | 308                      | 13,23               | 168                              | 54,55                       | 11             | 217                     | 9,32               | 41                | 11                        | 26,83                | 50%                                | 0.5                      | 45                              | 3                                        | 6,67                                | 4                                        | 36,36                               |
|                   | <i>P. marinus_nat12a</i>         | 1938            | 207                      | 10,68               | 132                              | 63,77                       | 12             | 180                     | 9,29               | 4                 | 0                         | 0                    | 90%                                | 0.6                      | 39                              | 3                                        | 7,69                                | 3                                        | 25,00                               |
|                   | <i>Synechococcus_cc9605</i>      | 2749            | 746                      | 27,14               | 613                              | 82,17                       | 36             | 750                     | 27,28              | 239               | 211                       | 88,28                | 90%                                | 0.5                      | 46                              | 12                                       | 26,09                               | 21                                       | 58,33                               |
|                   | <i>Synechococcus_cc9902</i>      | 2355            | 457                      | 19,41               | 317                              | 69,37                       | 20             | 401                     | 17,03              | 38                | 22                        | 57,89                | 80%                                | 0.5                      | 45                              | 6                                        | 13,33                               | 10                                       | 50,00                               |
| Synechococcus     | <i>Synechococcus_pcc6301</i>     | 2580            | 314                      | 12,17               | 123                              | 39,17                       | 9              | 150                     | 5,81               | 2                 | 0                         | 0                    | 80%                                | 0.5                      | 45                              | 2                                        | 4,44                                | 3                                        | 33,33                               |
|                   | <i>Synechococcus_pcc7942</i>     | 2664            | 399                      | 14,98               | 158                              | 39,60                       | 12             | 194                     | 7,28               | 65                | 10                        | 15,38                | 70%                                | 0.5                      | 45                              | 6                                        | 13,33                               | 10                                       | 83,33                               |
|                   | <i>Synechococcus_wh8102</i>      | 2581            | 586                      | 22,70               | 446                              | 76,11                       | 24             | 530                     | 20,53              | 104               | 68                        | 65,38                | 80%                                | 0.4                      | 44                              | 8                                        | 18,18                               | 11                                       | 45,83                               |
|                   | <i>L. borgpetersenii_b197</i>    | 3242            | 134                      | 4,13                | 41                               | 30,60                       | 3              | 50                      | 1,54               | 2                 | 0                         | 0                    | 50%                                | 0.5                      | 37                              | 0                                        | 0                                   | 0                                        | 0                                   |
| Leptospira        | <i>L. borgpetersenii_1550</i>    | 3273            | 224                      | 6,84                | 77                               | 34,38                       | 8              | 129                     | 3,94               | 1                 | 0                         | 0                    | 80%                                | 0.5                      | 37                              | 0                                        | 0                                   | 0                                        | 0                                   |
|                   | <i>L. interrogans</i>            | 4768            | 1532                     | 32,13               | 1064                             | 69,45                       | 80             | 1413                    | 29,64              | 449               | 226                       | 50,33                | 50%                                | 0.6                      | 37                              | 4                                        | 10,81                               | 5                                        | 6,25                                |
|                   | <i>C. felis</i>                  | 1046            | 48                       | 4,59                | 0                                | 0                           | 0              | 0                       | 0                  | 25                | 0                         | 0                    | 90%                                | 0.5                      | 38                              | 0                                        | 0                                   | 0                                        | 0                                   |
| Chlamydia         | <i>C. pneumoniae</i>             | 1122            | 51                       | 4,55                | 8                                | 15,69                       | 1              | 11                      | 0,98               | 1                 | 0                         | 0                    | 90%                                | 0.5                      | 37                              | 0                                        | 0                                   | 0                                        | 0                                   |
|                   | <i>C. pneumoniae_ar39</i>        | 1167            | 159                      | 13,62               | 105                              | 66,04                       | 9              | 138                     | 11,83              | 1                 | 1                         | 100,00               | 50%                                | 0.6                      | 38                              | 0                                        | 0                                   | 0                                        | 0                                   |
|                   | <i>C. pneumoniae_1138</i>        | 1107            | 53                       | 4,79                | 8                                | 15,09                       | 1              | 10                      | 0,90               | 1                 | 0                         | 0                    | 90%                                | 0.5                      | 37                              | 0                                        | 0                                   | 0                                        | 0                                   |
|                   | <i>C. pneumoniae_tw183</i>       | 1155            | 114                      | 9,87                | 66                               | 57,89                       | 7              | 82                      | 7,10               | 1                 | 0                         | 0                    | 50%                                | 0.5                      | 37                              | 0                                        | 0                                   | 0                                        | 0                                   |
|                   | <i>C. caviae</i>                 | 1053            | 68                       | 6,46                | 24                               | 35,29                       | 3              | 27                      | 2,56               | 28                | 6                         | 21,43                | 90%                                | 0.5                      | 38                              | 1                                        | 2,63                                | 1                                        | 33,33                               |
|                   | <i>C. abortus</i>                | 1003            | 36                       | 3,59                | 0                                | 0                           | 0              | 0                       | 0                  | 4                 | 0                         | 0                    | 60%                                | 0.6                      | 39                              | 0                                        | 0                                   | 0                                        | 0                                   |
|                   | <i>M. avium_104</i>              | 5313            | 683                      | 12,86               | 270                              | 39,53                       | 21             | 366                     | 6,89               | 224               | 89                        | 39,73                | 100%                               | 0.4                      | 47                              | 4                                        | 8,51                                | 5                                        | 23,81                               |
| Mycobacterium     | <i>M. avium_paratuberculosis</i> | 4398            | 386                      | 8,78                | 159                              | 41,19                       | 14             | 218                     | 4,96               | 34                | 26                        | 76,47                | 100%                               | 0.6                      | 46                              | 5                                        | 10,87                               | 7                                        | 50,00                               |
|                   | <i>M. bovis</i>                  | 4003            | 473                      | 11,82               | 269                              | 56,87                       | 27             | 337                     | 8,42               | 1                 | 0                         | 0,00                 | 70%                                | 0.5                      | 45                              | 7                                        | 15,56                               | 9                                        | 33,33                               |
|                   | <i>M. leprae</i>                 | 2770            | 1081                     | 39,03               | 890                              | 82,33                       | 58             | 1153                    | 41,62              | 72                | 52                        | 72,22                | 50%                                | 0.5                      | 46                              | 16                                       | 34,78                               | 25                                       | 43,10                               |
|                   | <i>Mycobacterium_kms</i>         | 5551            | 1074                     | 19,35               | 691                              | 64,34                       | 47             | 902                     | 16,25              | 4                 | 4                         | 100,00               | 50%                                | 0.6                      | 48                              | 10                                       | 20,83                               | 17                                       | 36,17                               |
|                   | <i>Mycobacterium_mcs</i>         | 5473            | 763                      | 13,94               | 389                              | 50,98                       | 28             | 500                     | 9,14               | 3                 | 0                         | 0                    | 60%                                | 0.6                      | 49                              | 6                                        | 12,24                               | 10                                       | 35,71                               |
|                   | <i>M. tuberculosis</i>           | 4048            | 547                      | 13,51               | 324                              | 59,23                       | 29             | 401                     | 9,91               | 1                 | 0                         | 0                    | 50%                                | 0.5                      | 45                              | 4                                        | 8,89                                | 5                                        | 17,24                               |
|                   | <i>M. tuberculosis_cdc1551</i>   | 4293            | 742                      | 17,28               | 461                              | 62,13                       | 39             | 587                     | 13,67              | 5                 | 3                         | 60,00                | 100%                               | 0.5                      | 45                              | 6                                        | 13,33                               | 8                                        | 20,51                               |
|                   | <i>M. ulcerans</i>               | 4981            | 1068                     | 21,44               | 700                              | 65,54                       | 67             | 942                     | 18,91              | 36                | 21                        | 58,33                | 100%                               | 0.5                      | 45                              | 9                                        | 20,00                               | 12                                       | 17,91                               |
|                   | <i>M. smegmatis</i>              | 6938            | 1373                     | 19,79               | 597                              | 43,48                       | 50             | 805                     | 11,60              | 405               | 114                       | 28,15                | 100%                               | 0.6                      | 50                              | 7                                        | 14,00                               | 11                                       | 22,00                               |

|                             |                                 |      |                  |       |       |       |     |                |                 |     |                |                |                |     |     |             |            |       |            |
|-----------------------------|---------------------------------|------|------------------|-------|-------|-------|-----|----------------|-----------------|-----|----------------|----------------|----------------|-----|-----|-------------|------------|-------|------------|
| Lactobacillus               | <i>L. johnsonii</i>             | 1918 | 303              | 15,80 | 162   | 53,47 | 11  | 196            | 10,22           | 46  | 24             | 52,17          | 60%            | 0.5 | 79  | 3           | 3,80       | 4     | 36,36      |
|                             | <i>L. acidophilus</i>           | 1938 | 467              | 24,10 | 317   | 67,88 | 27  | 432            | 22,29           | 88  | 51             | 57,95          | 50%            | 0.6 | 61  | 2           | 3,28       | 3     | 11,11      |
|                             | <i>L. brevis</i>                | 2314 | 612              | 26,45 | 376   | 61,44 | 29  | 498            | 21,52           | 187 | 85             | 45,45          | 60%            | 0.5 | 66  | 7           | 10,61      | 10    | 34,48      |
|                             | <i>L. casei</i>                 | 2909 | 838              | 28,81 | 528   | 63,01 | 32  | 692            | 23,79           | 329 | 176            | 53,50          | 80%            | 0.4 | 60  | 3           | 5,00       | 6     | 18,75      |
|                             | <i>L. delbrueckii</i>           | 2217 | 772              | 34,82 | 664   | 86,01 | 36  | 854            | 38,52           | 28  | 21             | 75,00          | 80%            | 0.4 | 95  | 12          | 12,63      | 20    | 55,56      |
|                             | <i>L. delbrueckii_baa-365</i>   | 2040 | 584              | 28,63 | 416   | 71,23 | 26  | 543            | 26,62           | 101 | 61             | 60,40          | 60%            | 0.5 | 99  | 7           | 7,07       | 10    | 38,46      |
|                             | <i>L. gasserii</i>              | 1898 | 428              | 22,55 | 283   | 66,12 | 16  | 352            | 18,55           | 50  | 24             | 48,00          | 50%            | 0.5 | 79  | 8           | 10,13      | 15    | 93,75      |
|                             | <i>L. plantarum</i>             | 3136 | 836              | 26,66 | 558   | 66,75 | 38  | 728            | 23,21           | 194 | 87             | 44,85          | 70%            | 0.4 | 70  | 11          | 15,71      | 17    | 44,74      |
|                             | <i>L. sakei</i>                 | 1963 | 397              | 20,22 | 227   | 57,18 | 20  | 296            | 15,08           | 133 | 55             | 41,35          | 80%            | 0.5 | 63  | 4           | 6,35       | 6     | 30,00      |
|                             | <i>L. salivarius</i>            | 2106 | 522              | 24,79 | 360   | 68,97 | 19  | 438            | 20,80           | 181 | 120            | 66,30          | 90%            | 0.5 | 78  | 3           | 3,85       | 6     | 31,58      |
|                             | <i>S. pyogenes</i>              | 1805 | 177              | 9,81  | 160   | 90,40 | 7   | 190            | 10,53           | 2   | 2              | 100,00         | 50%            | 0.5 | 61  | 0           | 0          | 0     | 0          |
|                             | <i>S. pyogenes_m3</i>           | 1951 | 310              | 15,89 | 287   | 92,58 | 6   | 338            | 17,32           | 1   | 1              | 100,00         | 60%            | 0.5 | 68  | 1           | 1,47       | 1     | 16,67      |
|                             | <i>S. pyogenes_mgas10394</i>    | 1971 | 293              | 14,87 | 244   | 83,28 | 10  | 274            | 13,90           | 2   | 2              | 100,00         | 50%            | 0.5 | 67  | 2           | 2,99       | 2     | 20,00      |
| <i>S. pyogenes_mgas5005</i> | 1950                            | 219  | 11,23            | 160   | 73,06 | 5     | 189 | 9,69           | 1               | 0   | 0              | 50%            | 0.5            | 67  | 1   | 1,49        | 1          | 20,00 |            |
| <i>S. pyogenes_mgas6180</i> | 1977                            | 264  | 13,35            | 215   | 81,44 | 9     | 242 | 12,24          | 1               | 0   | 0              | 80%            | 0.5            | 65  | 1   | 1,54        | 2          | 22,22 |            |
| <i>S. pyogenes_ssi1</i>     | 1928                            | 312  | 16,18            | 291   | 93,27 | 6     | 338 | 17,53          | 1               | 0   | 0              | 80%            | 0.5            | 57  | 0   | 0           | 0          | 0     |            |
| Bacillus                    | <i>B. anthracis</i>             | 5630 | 1293             | 22,97 | 911   | 70,46 | 70  | 1168           | 20,75           | 1   | 0              | 0              | 80%            | 0.5 | 95  | 1           | 1,05       | 2     | 2,86       |
|                             | <i>B. anthracis_ames0581</i>    | 5635 | 1141             | 20,25 | 717   | 62,84 | 52  | 911            | 16,17           | 1   | 0              | 0              | 80%            | 0.5 | 95  | 1           | 1,05       | 2     | 3,85       |
|                             | <i>B. anthracis_sterne</i>      | 5415 | 1705             | 31,49 | 1384  | 81,17 | 92  | 1850           | 34,16           | 1   | 0              | 0              | 80%            | 0.5 | 95  | 1           | 1,05       | 2     | 2,17       |
|                             | <i>B. cereus</i>                | 5476 | 1217             | 22,22 | 848   | 69,68 | 53  | 1098           | 20,05           | 45  | 40             | 88,89          | 80%            | 0.5 | 108 | 4           | 3,70       | 7     | 13,21      |
|                             | <i>B. cereus_atcc10987</i>      | 5772 | 2073             | 35,91 | 1766  | 85,19 | 117 | 2343           | 40,59           | 137 | 113            | 82,48          | 80%            | 0.5 | 98  | 3           | 3,06       | 6     | 5,13       |
|                             | <i>B. cereus_zk</i>             | 5269 | 952              | 18,07 | 582   | 61,13 | 49  | 757            | 14,37           | 15  | 13             | 86,67          | 80%            | 0.5 | 96  | 2           | 2,08       | 3     | 6,12       |
|                             | <i>B. clausii</i>               | 4204 | 814              | 19,36 | 490   | 60,20 | 32  | 623            | 14,82           | 163 | 78             | 47,85          | 80%            | 0.5 | 74  | 4           | 5,41       | 5     | 15,63      |
|                             | <i>B. halodurans</i>            | 4171 | 767              | 18,39 | 349   | 45,50 | 29  | 469            | 11,24           | 273 | 70             | 25,64          | 90%            | 0.5 | 78  | 3           | 3,85       | 4     | 13,79      |
|                             | <i>B. licheniformis</i>         | 4290 | 739              | 17,23 | 431   | 58,32 | 24  | 526            | 12,26           | 53  | 18             | 33,96          | 80%            | 0.6 | 72  | 3           | 4,17       | 4     | 16,67      |
|                             | <i>B. licheniformis_dsm13</i>   | 4289 | 631              | 14,71 | 309   | 48,97 | 19  | 394            | 9,19            | 47  | 15             | 31,91          | 80%            | 0.5 | 70  | 3           | 4,29       | 4     | 21,05      |
|                             | <i>B. thuringiensis</i>         | 5261 | 853              | 16,21 | 457   | 53,58 | 40  | 591            | 11,23           | 13  | 8              | 61,54          | 70%            | 0.5 | 105 | 1           | 0,95       | 2     | 5,00       |
|                             | <i>S. aureus_col</i>            | 2724 | 215              | 7,89  | 120   | 55,81 | 8   | 153            | 5,62            | 1   | 1              | 100,00         | 80%            | 0.6 | 54  | 0           | 0          | 0     | 0          |
|                             | <i>S. aureus_mrsa252</i>        | 2845 | 308              | 10,83 | 236   | 76,62 | 9   | 296            | 10,40           | 10  | 6              | 60,00          | 50%            | 0.7 | 60  | 1           | 1,67       | 1     | 11,11      |
| <i>S. aureus_mssa476</i>    | 2723                            | 231  | 8,48             | 152   | 65,80 | 9     | 191 | 7,01           | 2               | 1   | 50,00          | 50%            | 0.6            | 60  | 0   | 0           | 0          | 0     |            |
| <i>S. aureus_mu50</i>       | 2775                            | 257  | 9,26             | 213   | 82,88 | 12    | 263 | 9,48           | 2               | 2   | 100,00         | 90%            | 0.5            | 61  | 2   | 3,28        | 2          | 16,67 |            |
| <i>S. aureus_mw2</i>        | 2712                            | 231  | 8,52             | 167   | 72,29 | 9     | 209 | 7,71           | 2               | 2   | 100,00         | 50%            | 0.6            | 61  | 1   | 1,64        | 1          | 11,11 |            |
| <i>S. aureus_n315</i>       | 2669                            | 152  | 5,70             | 101   | 66,45 | 10    | 134 | 5,02           | 1               | 1   | 100,00         | 50%            | 0.6            | 63  | 1   | 1,59        | 1          | 10,00 |            |
| <i>S. aureus_nctc8325</i>   | 2969                            | 380  | 12,80            | 221   | 58,16 | 7     | 269 | 9,06           | 1               | 0   | 0              | 100%           | 0.5            | 61  | 0   | 0           | 0          | 0     |            |
| <i>S. aureus_rf122</i>      | 2665                            | 261  | 9,79             | 178   | 68,20 | 8     | 215 | 8,07           | 21              | 12  | 57,14          | 50%            | 0.6            | 60  | 1   | 1,67        | 1          | 12,50 |            |
| <i>S. aureus_usa300</i>     | 2648                            | 218  | 8,23             | 157   | 72,02 | 7     | 206 | 7,78           | 1               | 1   | 100,00         | 50%            | 0.6            | 54  | 1   | 1,85        | 1          | 14,29 |            |
| <i>S. epidermidis</i>       | 2495                            | 282  | 11,30            | 151   | 53,55 | 10    | 191 | 7,66           | 60              | 31  | 51,67          | 50%            | 0.7            | 60  | 0   | 0           | 0          | 0     |            |
| <i>S. epidermidis_rp62a</i> | 2635                            | 355  | 13,47            | 206   | 58,03 | 8     | 250 | 9,49           | 150             | 88  | 58,67          | 80%            | 0.6            | 62  | 0   | 0           | 0          | 0     |            |
| <i>S. haemolyticus</i>      | 2753                            | 455  | 16,53            | 310   | 68,13 | 18    | 385 | 13,98          | 151             | 77  | 50,99          | 50%            | 0.6            | 60  | 2   | 3,33        | 3          | 16,67 |            |
| Rickettsia                  | <i>R. prowazekii</i>            | 886  | 16               | 1,81  | 0     | 0     | 0   | 0              | 7               | 0   | 0              | 50%            | 0.5            | 33  | 0   | 0           | 0          | 0     |            |
|                             | <i>R. bellii</i>                | 1469 | 142              | 9,67  | 44    | 30,99 | 6   | 59             | 4,02            | 17  | 1              | 5,88           | 50%            | 0.5 | 35  | 1           | 2,86       | 2     | 33,33      |
|                             | <i>R. conorii</i>               | 1414 | 226              | 15,98 | 123   | 54,42 | 12  | 157            | 11,10           | 8   | 3              | 37,50          | 50%            | 0.5 | 34  | 3           | 8,82       | 4     | 33,33      |
|                             | <i>R. felis</i>                 | 1439 | 181              | 12,58 | 83    | 45,86 | 7   | 103            | 7,16            | 22  | 7              | 31,82          | 70%            | 0.5 | 34  | 3           | 8,82       | 5     | 71,43      |
|                             | <i>R. typhi</i>                 | 919  | 688              | 74,86 | 456   | 66,28 | 0   | 0              | 0               | 22  | 0              | 0              | 70%            | 0.4 | 34  | 0           | 0          | 0     | 0          |
| Helicobacter                | <i>H. pylori_hpag1</i>          | 1576 | 69               | 4,38  | 9     | 13,04 | 1   | 11             | 0,70            | 13  | 0              | 0              | 70%            | 0.5 | 36  | 0           | 0          | 0     | 0          |
|                             | <i>H. pylori</i>                | 1630 | 118              | 7,24  | 64    | 54,24 | 3   | 77             | 4,72            | 37  | 19             | 51,35          | 70%            | 0.5 | 36  | 1           | 2,78       | 1     | 33,33      |
|                             | <i>H. acinonychis</i>           | 1654 | 224              | 13,54 | 133   | 59,38 | 12  | 156            | 9,43            | 58  | 24             | 41,38          | 50%            | 0.5 | 36  | 0           | 0          | 0     | 0          |
|                             | <i>H. hepaticus</i>             | 1915 | 443              | 23,13 | 205   | 46,28 | 13  | 274            | 14,31           | 259 | 81             | 31,27          | 50%            | 0.4 | 37  | 0           | 0          | 0     | 0          |
|                             | <i>E. coli</i>                  | 4411 | 504              | 11,43 | 348   | 69,05 | 18  | 398            | 9,02            | 3   | 3              | 100,00         | 70%            | 0.5 | 83  | 4           | 4,82       | 5     | 27,78      |
| Enterobacteria              | <i>E. coli_cft073</i>           | 5589 | 1419             | 25,39 | 1088  | 76,67 | 33  | 1259           | 22,53           | 38  | 35             | 92,11          | 70%            | 0.6 | 89  | 12          | 13,48      | 19    | 57,58      |
|                             | <i>E. coli_o157</i>             | 5453 | 1486             | 27,25 | 1284  | 86,41 | 38  | 1458           | 26,74           | 27  | 22             | 81,48          | 100%           | 0.5 | 98  | 24          | 24,49      | 26    | 68,42      |
|                             | <i>E. coli_o157j</i>            | 5395 | 1405             | 26,04 | 1224  | 87,12 | 33  | 1367           | 25,34           | 20  | 19             | 95,00          | 90%            | 0.4 | 106 | 24          | 22,64      | 26    | 78,79      |
|                             | <i>S. typhi</i>                 | 4711 | 922              | 19,57 | 744   | 80,69 | 32  | 868            | 18,42           | 5   | 5              | 100,00         | 70%            | 0.6 | 79  | 11          | 13,92      | 15    | 46,88      |
|                             | <i>S. typhi_ty2</i>             | 4645 | 805              | 17,33 | 630   | 78,26 | 31  | 746            | 16,06           | 1   | 1              | 100,00         | 100%           | 0.5 | 78  | 9           | 11,54      | 11    | 35,48      |
|                             | <i>S. typhimurium</i>           | 4622 | 635              | 13,74 | 448   | 70,55 | 26  | 546            | 11,81           | 2   | 1              | 50,00          | 70%            | 0.5 | 86  | 7           | 8,14       | 10    | 38,46      |
|                             | <i>S. enterica_choleraesuis</i> | 4699 | 699              | 14,88 | 476   | 68,10 | 27  | 600            | 12,77           | 12  | 11             | 91,67          | 50%            | 0.5 | 85  | 6           | 7,06       | 8     | 29,63      |
|                             | <i>S. enterica_paratyphi</i>    | 4403 | 646              | 14,67 | 456   | 70,59 | 27  | 550            | 12,49           | 1   | 0              | 0              | 90%            | 0.5 | 82  | 8           | 9,76       | 11    | 40,74      |
|                             | <i>Y. pestis</i>                | 4113 | 766              | 18,62 | 502   | 65,54 | 34  | 619            | 15,05           | 1   | 1              | 100,00         | 100%           | 0.4 | 70  | 7           | 10,00      | 9     | 26,47      |
|                             | <i>Y. pestis_kim</i>            | 4240 | 974              | 22,97 | 682   | 70,02 | 45  | 855            | 20,17           | 1   | 0              | 0              | 70%            | 0.6 | 74  | 9           | 12,16      | 10    | 22,22      |
|                             | <i>Y. pestis_mediaeavails</i>   | 4138 | 848              | 20,49 | 582   | 68,63 | 40  | 723            | 17,47           | 1   | 0              | 0              | 100%           | 0.5 | 72  | 8           | 11,11      | 9     | 22,50      |
|                             | <i>Y. pseudotuberculosis</i>    | 4095 | 818              | 19,98 | 638   | 78,00 | 32  | 773            | 18,88           | 13  | 12             | 92,31          | 100%           | 0.5 | 85  | 4           | 4,71       | 6     | 18,75      |
|                             | <b>Total</b>                    |      | <b>351111,00</b> |       |       |       |     | <b>2377,00</b> | <b>47441,00</b> |     | <b>8428,00</b> | <b>3475,00</b> | <b>5121,15</b> |     |     | <b>6739</b> | <b>420</b> |       | <b>595</b> |
